# Supplementary material
Source: publisher figshare collection journal article supplement (https://acs.figshare.com/ndownloader/files/23707517)
Supplement: Supplementary file 1 [file 23707517]

## Supporting Information

# Phonon Spectra of Strongly Luminescent Non-Stoichiometric Ag-In-S, Cu-In-S, and Hg-In-S Nanocrystals of Small Size

*Volodymyr Dzhagan<sup>1,2,\*</sup>, Oleksandr Selyshchev<sup>3</sup>, Oleksandra Raievska<sup>3,4,5</sup>, Oleksandr Stroyuk<sup>5,6</sup>, Lukas Hertling<sup>3</sup>, Nazar Mazur<sup>1</sup>, Mykhailo Ya. Valakh<sup>1</sup>, Dietrich R.T. Zahn<sup>3,4</sup>*

<sup>1</sup> V. Lashkaryov Institute of Semiconductors Physics, National Academy of Sciences of Ukraine, Kyiv, Ukraine

<sup>2</sup> Taras Shevchenko National University of Kyiv, 64 Volodymyrs'ka St., 01601 Kyiv, Ukraine

<sup>3</sup> Semiconductor Physics, Chemnitz University of Technology, D-09107 Chemnitz, Germany

<sup>4</sup> Center for Materials, Architectures, and Integration of Nanomembranes (MAIN), Chemnitz University of Technology, D-09107 Chemnitz, Germany

<sup>5</sup> L.V. Pysarzhevsky Institute of Physical Chemistry, Nat. Acad. of Science of Ukraine, 03028 Kyiv, Ukraine.

<sup>6</sup> Forschungszentrum Jülich GmbH, Helmholtz-Institut Erlangen Nürnberg für Erneuerbare Energien (HI ERN), Immerwahrstr. 2, 91058 Erlangen, Germany

## Table of contents

|                                                                                          |    |
|------------------------------------------------------------------------------------------|----|
| UV-vis and PL spectra of M-In-S core NCs and M-In-S/ZnS core/shell NCs                   | S2 |
| Experimental and reference XRD patterns                                                  | S2 |
| Survey XPS spectra and representative fit of the high-resolution XPS spectrum of Sulphur | S2 |
| Raman spectra at $\lambda_{\text{exc}} = 633 \text{ nm}$                                 | S3 |

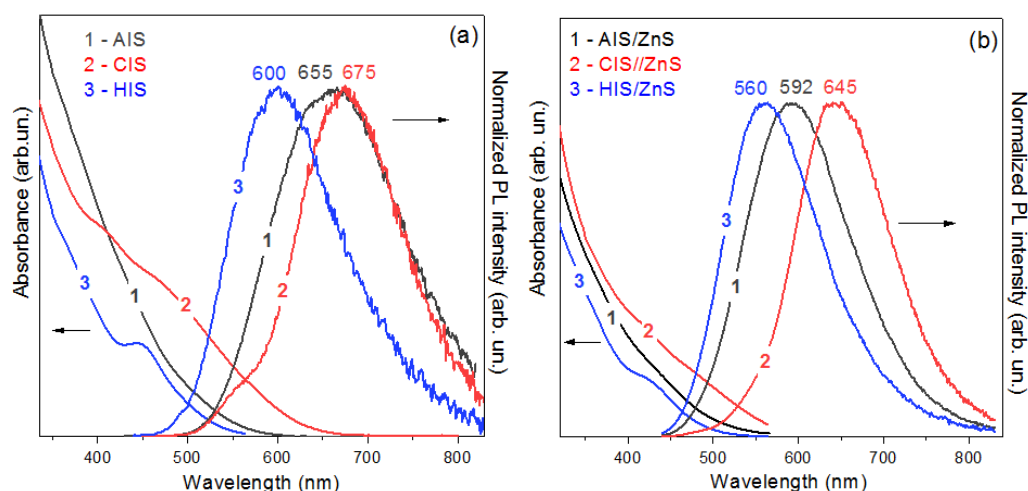

Figure S1. UV-vis and PL spectra of M-In-S core NCs (a) and M-In-S/ZnS core/shell NCs (b).

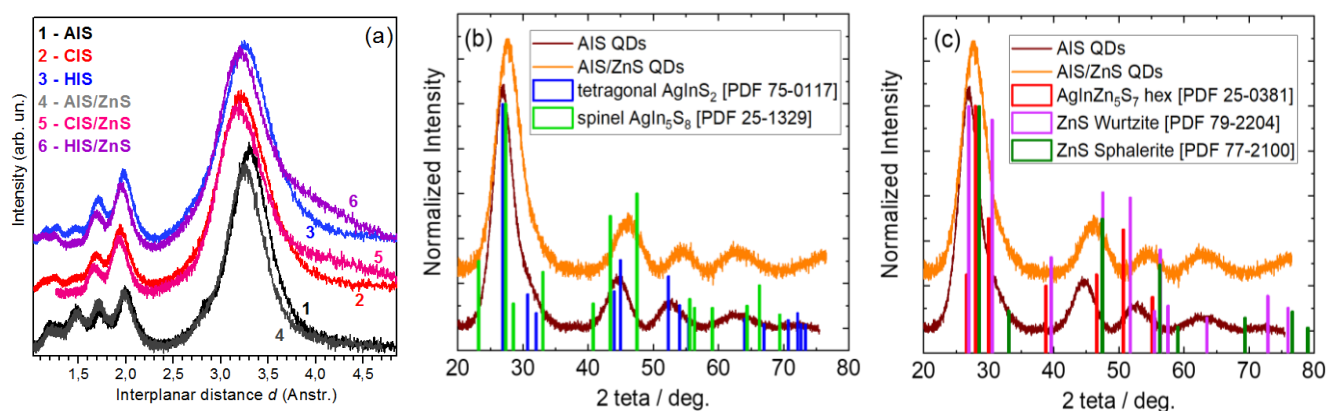

Figure S2. (a) Representative experimental XRD patterns of M-In-S NCs. (b) and (c) shows comparison of present Ag-In-S and Ag-In-S/ZnS NC patterns with relevant structures from the ICDD database.

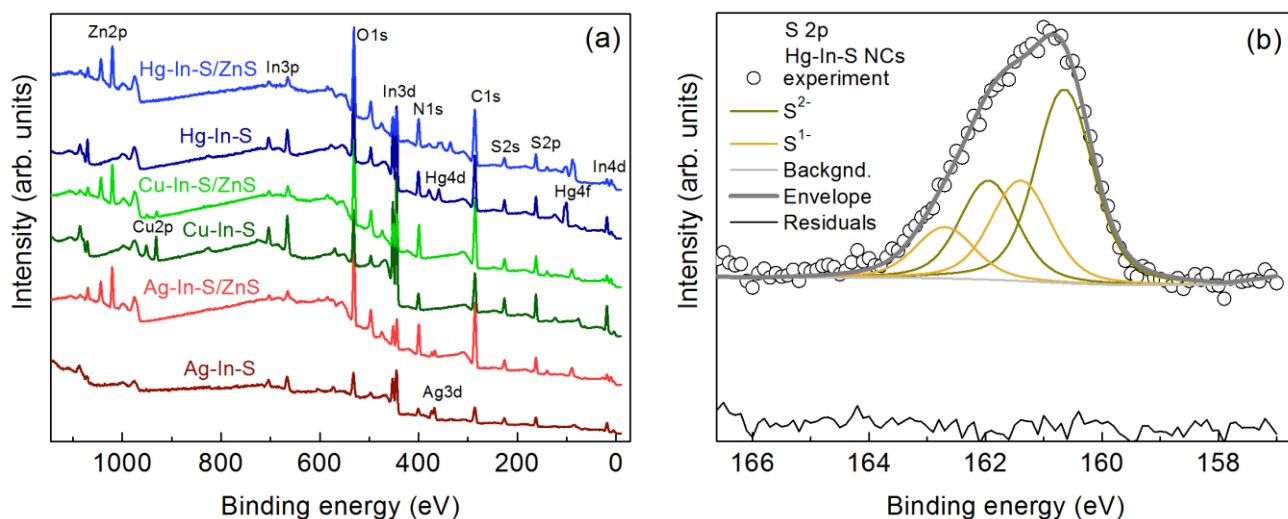

Figure S3. (a) Survey XPS spectra of the M-In-S and M-In-S/ZnS NCs. (b) Representative fit of the high-resolution XPS spectrum of Sulphur, revealing a S<sup>2-</sup>-component related with the inner part of the NC, and a surface-related S<sup>1-</sup>-component.

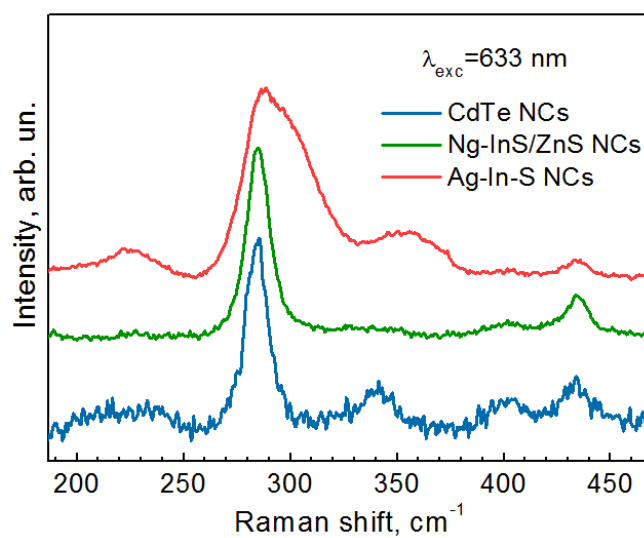

Figure S4. Raman spectra at  $\lambda_{\text{exc}} = 633 \text{ nm}$  of different compound NCs, for which PL was quenched by adding MV.
